# Supplementary material for: High-throughput design of complex oxides as isothermal, redox-activated CO2 sorbents for green hydrogen generation
Source: Royal Society of Chemistry journal article supplement (doi:10.1039/d4ee02119c), 2024-01-01
Supplement: d4ee02119c1.pdf [file d4ee02119c1.pdf]

*Electronic supplementary information*

**High-throughput design of complex oxides as isothermal,  
redox-activated CO<sub>2</sub> sorbents for hydrogen generation**

Runxia Cai,<sup>‡a</sup> Kunran Yang,<sup>‡a</sup> Xijun Wang,<sup>‡a,b</sup> Mahe Rukh,<sup>a</sup> Azin Saberi Bosari,<sup>a</sup> Eric Giavedoni,<sup>a</sup> Alexandra Pierce,<sup>a</sup> Leo Brody,<sup>a</sup> Wentao Tang,<sup>a</sup> Phillip R. Westmoreland,<sup>a</sup> Fanxing Li<sup>\*a</sup>

<sup>a</sup> *Department of Chemical and Biomolecular Engineering, North Carolina State University, 911 Partners Way, Raleigh, North Carolina 27695-7905, USA*

<sup>b</sup> *Department of Chemical and Biological Engineering, Northwestern University, Evanston, Illinois 60208, USA*

<sup>‡</sup> *These authors contributed equally to this work*

*\*Corresponding author, [fli5@ncsu.edu](mailto:fli5@ncsu.edu)*

1. Table S1. The perovskite PTSs tested in this study

| Sample number | Sample Name                                                                                      | Ball milling time and calcination temperature | XRD         | CO <sub>2</sub> capacity (%) |
|---------------|--------------------------------------------------------------------------------------------------|-----------------------------------------------|-------------|------------------------------|
| 1             | Sr <sub>0.625</sub> Ba <sub>0.375</sub> Fe <sub>0.75</sub> Co <sub>0.25</sub> O <sub>3-δ</sub>   | 24 h, 1000°C                                  | Pure        | 25.27                        |
| 2             | Sr <sub>0.5</sub> Ba <sub>0.5</sub> Fe <sub>0.75</sub> Co <sub>0.25</sub> O <sub>3-δ</sub>       | 24 h, 1000 °C                                 | Pure        | 25.02                        |
| 3             | Sr <sub>0.375</sub> Ba <sub>0.625</sub> Fe <sub>0.75</sub> Co <sub>0.25</sub> O <sub>3-δ</sub>   | 24 h, 1000 °C                                 | Pure        | 29.43                        |
| 4             | Sr <sub>0.25</sub> Ba <sub>0.75</sub> Fe <sub>0.75</sub> Co <sub>0.25</sub> O <sub>3-δ</sub>     | 3 h, 1000 °C                                  | Pure        | 26.61                        |
| 5             | Sr <sub>0.625</sub> Ba <sub>0.375</sub> Fe <sub>0.375</sub> Co <sub>0.625</sub> O <sub>3-δ</sub> | 3 h, 1000 °C                                  | Pure        | 46.18                        |
| 6             | Sr <sub>0.5</sub> Ba <sub>0.5</sub> Fe <sub>0.375</sub> Co <sub>0.625</sub> O <sub>3-δ</sub>     | 3 h, 1000 °C                                  | Pure        | 44.45                        |
| 7             | Sr <sub>0.375</sub> Ba <sub>0.625</sub> Fe <sub>0.375</sub> Co <sub>0.625</sub> O <sub>3-δ</sub> | 24 h, 1000 °C                                 | Pure        | 42.10                        |
| 8             | Sr <sub>0.25</sub> Ba <sub>0.75</sub> Fe <sub>0.375</sub> Co <sub>0.625</sub> O <sub>3-δ</sub>   | 24 h, 1000 °C                                 | Pure        | 46.61                        |
| 9             | Sr <sub>0.625</sub> Ba <sub>0.375</sub> Fe <sub>0.5</sub> Co <sub>0.5</sub> O <sub>3-δ</sub>     | 24 h, 1000 °C                                 | Pure        | 49.44                        |
| 10            | Sr <sub>0.375</sub> Ba <sub>0.625</sub> Fe <sub>0.5</sub> Co <sub>0.5</sub> O <sub>3-δ</sub>     | 24 h, 1000 °C                                 | Pure        | 28.26                        |
| 11            | Sr <sub>0.625</sub> Ba <sub>0.375</sub> Fe <sub>0.25</sub> Co <sub>0.75</sub> O <sub>3-δ</sub>   | 24 h, 1000 °C                                 | Pure        | 48.85                        |
| 12            | Sr <sub>0.5</sub> Ba <sub>0.5</sub> Fe <sub>0.25</sub> Co <sub>0.75</sub> O <sub>3-δ</sub>       | 24 h, 1000 °C                                 | Pure        | 48.59                        |
| 13            | Sr <sub>0.375</sub> Ba <sub>0.625</sub> Fe <sub>0.25</sub> Co <sub>0.75</sub> O <sub>3-δ</sub>   | 24 h, 1000 °C                                 | Pure        | 42.80                        |
| 14            | Sr <sub>0.25</sub> Ba <sub>0.75</sub> Fe <sub>0.25</sub> Co <sub>0.75</sub> O <sub>3-δ</sub>     | 24 h, 1000 °C                                 | Pure        | 34.03                        |
| 15            | Sr <sub>0.25</sub> Ba <sub>0.75</sub> Fe <sub>0.5</sub> Co <sub>0.5</sub> O <sub>3-δ</sub>       | 24 h, 1000 °C                                 | Pure        | 17.89                        |
| 16            | Sr <sub>0.125</sub> Ba <sub>0.875</sub> Fe <sub>0.75</sub> Co <sub>0.25</sub> O <sub>3-δ</sub>   | 24 h, 1000 °C                                 | Nearly pure | 17.24                        |
| 17            | Sr <sub>0.125</sub> Ba <sub>0.875</sub> Fe <sub>0.5</sub> Co <sub>0.5</sub> O <sub>3-δ</sub>     | 24 h, 1000 °C                                 | Pure        | 20.14                        |
| 18            | Sr <sub>0.5</sub> Ba <sub>0.5</sub> Fe <sub>0.5</sub> Co <sub>0.5</sub> O <sub>3-δ</sub>         | 3 h, 1000 °C                                  | Pure        | 29.88                        |
| 19            | Sr <sub>0.625</sub> Ba <sub>0.375</sub> Fe <sub>0.875</sub> Co <sub>0.125</sub> O <sub>3-δ</sub> | 24 h, 1000 °C                                 | Pure        | 10.65                        |
| 20            | Sr <sub>0.5</sub> Ba <sub>0.5</sub> Fe <sub>0.875</sub> Co <sub>0.125</sub> O <sub>3-δ</sub>     | 3 h, 1000 °C                                  | Pure        | 11.87                        |
| 21            | Sr <sub>0.375</sub> Ba <sub>0.625</sub> Fe <sub>0.875</sub> Co <sub>0.125</sub> O <sub>3-δ</sub> | 24 h, 1000 °C                                 | Pure        | 10.56                        |
| 22            | Sr <sub>0.25</sub> Ba <sub>0.75</sub> Fe <sub>0.875</sub> Co <sub>0.125</sub> O <sub>3-δ</sub>   | 3 h, 1000 °C                                  | Pure        | 14.64                        |
| 23            | Sr <sub>0.875</sub> Ca <sub>0.125</sub> Fe <sub>0.125</sub> Co <sub>0.875</sub> O <sub>3-δ</sub> | 3 h, 1000 °C                                  | pure        | 15.17                        |
| 24            | Sr <sub>0.75</sub> Ca <sub>0.25</sub> Fe <sub>0.125</sub> Co <sub>0.875</sub> O <sub>3-δ</sub>   | 3 h, 1000 °C                                  | Pure        | 13.80                        |
| 25            | Sr <sub>0.875</sub> Ca <sub>0.125</sub> Fe <sub>0.25</sub> Co <sub>0.75</sub> O <sub>3-δ</sub>   | 3 h, 1000 °C                                  | Pure        | 4.97                         |
| 26            | Sr <sub>0.75</sub> Ca <sub>0.25</sub> Fe <sub>0.25</sub> Co <sub>0.75</sub> O <sub>3-δ</sub>     | 3 h, 1000 °C                                  | Pure        | 9.39                         |
| 27            | Sr <sub>0.25</sub> Ba <sub>0.75</sub> Fe <sub>0.875</sub> Ni <sub>0.125</sub> O <sub>3-δ</sub>   | 3 h, 1000 °C                                  | Pure        | 13.40                        |
| 28            | Sr <sub>0.375</sub> Ba <sub>0.625</sub> Fe <sub>0.875</sub> Ni <sub>0.125</sub> O <sub>3-δ</sub> | 3 h, 1000 °C                                  | Pure        | 12.21                        |
| 29            | Sr <sub>0.5</sub> Ba <sub>0.5</sub> Fe <sub>0.875</sub> Ni <sub>0.125</sub> O <sub>3-δ</sub>     | 3 h, 1000 °C                                  | Pure        | 10.33                        |
| 30            | Sr <sub>0.625</sub> Ba <sub>0.375</sub> Fe <sub>0.875</sub> Ni <sub>0.125</sub> O <sub>3-δ</sub> | 3 h, 1000 °C                                  | Pure        | 9.13                         |
| 31            | Sr <sub>0.875</sub> Ca <sub>0.125</sub> Fe <sub>0.375</sub> Co <sub>0.625</sub> O <sub>3-δ</sub> | 3 h, 1000 °C                                  | Pure        | 2.94                         |
| 32            | Sr <sub>0.75</sub> Ca <sub>0.25</sub> Fe <sub>0.375</sub> Co <sub>0.625</sub> O <sub>3-δ</sub>   | 3 h, 1000 °C                                  | Pure        | 2.66                         |
| 33            | Sr <sub>0.625</sub> Ca <sub>0.375</sub> Fe <sub>0.125</sub> Co <sub>0.875</sub> O <sub>3-δ</sub> | 3 h, 1000 °C                                  | Pure        | 15.96                        |
| 34            | Sr <sub>0.625</sub> Ca <sub>0.375</sub> Fe <sub>0.25</sub> Co <sub>0.75</sub> O <sub>3-δ</sub>   | 3 h, 1000 °C                                  | Pure        | 13.94                        |
| 35            | Sr <sub>0.25</sub> Ba <sub>0.75</sub> Fe <sub>0.75</sub> Ni <sub>0.25</sub> O <sub>3-δ</sub>     | 3 h, 1000 °C                                  | Impure      | -                            |
| 36            | Sr <sub>0.375</sub> Ba <sub>0.625</sub> Fe <sub>0.75</sub> Ni <sub>0.25</sub> O <sub>3-δ</sub>   | 3 h, 1000 °C                                  | Impure      | -                            |
| 37            | Sr <sub>0.5</sub> Ba <sub>0.5</sub> Fe <sub>0.75</sub> Ni <sub>0.25</sub> O <sub>3-δ</sub>       | 3 h, 1000 °C                                  | Impure      | -                            |

|    |                                                                                           |              |             |       |
|----|-------------------------------------------------------------------------------------------|--------------|-------------|-------|
| 38 | $\text{Sr}_{0.625}\text{Ba}_{0.375}\text{Fe}_{0.75}\text{Ni}_{0.25}\text{O}_{3-\delta}$   | 3 h, 1000 °C | Impure      | -     |
| 39 | $\text{Sr}_{0.875}\text{Ca}_{0.125}\text{Fe}_{0.125}\text{Mn}_{0.875}\text{O}_{3-\delta}$ | 3 h, 1200 °C | Nearly pure | 53.36 |
| 40 | $\text{Sr}_{0.875}\text{Ca}_{0.125}\text{Fe}_{0.25}\text{Mn}_{0.75}\text{O}_{3-\delta}$   | 3 h, 1200 °C | Nearly pure | 27.41 |
| 41 | $\text{SrCaFe}_{0.125}\text{Mn}_{0.875}\text{O}_{3-\delta}$                               | 3 h, 1200 °C | Nearly pure | 59.36 |
| 42 | $\text{SrFe}_{0.25}\text{Mn}_{0.75}\text{O}_{3-\delta}$                                   | 3 h, 1200 °C | Nearly pure | 21.19 |
| 43 | $\text{Sr}_{0.25}\text{Ba}_{0.75}\text{Fe}_{0.75}\text{Mn}_{0.25}\text{O}_{3-\delta}$     | 3 h, 1000 °C | Impure      | -     |
| 44 | $\text{Sr}_{0.375}\text{Ba}_{0.625}\text{Fe}_{0.75}\text{Mn}_{0.25}\text{O}_{3-\delta}$   | 3 h, 1000 °C | Impure      | -     |
| 45 | $\text{Sr}_{0.5}\text{Ba}_{0.5}\text{Fe}_{0.75}\text{Mn}_{0.25}\text{O}_{3-\delta}$       | 3 h, 1000 °C | Impure      | -     |
| 46 | $\text{Sr}_{0.625}\text{Ba}_{0.375}\text{Fe}_{0.75}\text{Mn}_{0.25}\text{O}_{3-\delta}$   | 3 h, 1000 °C | Impure      | -     |
| 47 | $\text{Sr}_{0.375}\text{Ba}_{0.625}\text{Fe}_{0.875}\text{Cu}_{0.125}\text{O}_{3-\delta}$ | 3 h, 1000 °C | Pure        | 1.23  |
| 48 | $\text{Sr}_{0.5}\text{Ba}_{0.5}\text{Fe}_{0.875}\text{Cu}_{0.125}\text{O}_{3-\delta}$     | 3 h, 1000 °C | Pure        | 1.98  |
| 49 | $\text{Sr}_{0.625}\text{Ba}_{0.375}\text{Fe}_{0.875}\text{Cu}_{0.125}\text{O}_{3-\delta}$ | 3 h, 1000 °C | Pure        | 1.46  |
| 50 | $\text{Sr}_{0.25}\text{Ba}_{0.75}\text{Fe}_{0.875}\text{Cu}_{0.125}\text{O}_{3-\delta}$   | 3 h, 1000 °C | Pure        | 1.14  |
| 51 | $\text{Sr}_{0.875}\text{K}_{0.125}\text{Fe}_{0.375}\text{Co}_{0.625}\text{O}_{3-\delta}$  | 3 h, 1000 °C | Pure        | 7.84  |
| 52 | $\text{Sr}_{0.875}\text{K}_{0.125}\text{Fe}_{0.5}\text{Co}_{0.5}\text{O}_{3-\delta}$      | 3 h, 1000 °C | Pure        | 1.13  |
| 53 | $\text{Sr}_{0.875}\text{K}_{0.125}\text{Fe}_{0.625}\text{Co}_{0.375}\text{O}_{3-\delta}$  | 3 h, 1000 °C | Pure        | 0.91  |
| 54 | $\text{Sr}_{0.875}\text{K}_{0.125}\text{Fe}_{0.875}\text{Mn}_{0.125}\text{O}_{3-\delta}$  | 3 h, 1000 °C | Pure        | 1.47  |
| 55 | $\text{Sr}_{0.875}\text{K}_{0.125}\text{Fe}_{0.625}\text{Mn}_{0.375}\text{O}_{3-\delta}$  | 3 h, 1000 °C | Pure        | 4.87  |
| 56 | $\text{Sr}_{0.875}\text{K}_{0.125}\text{Fe}_{0.5}\text{Mn}_{0.5}\text{O}_{3-\delta}$      | 3 h, 1000 °C | Pure        | 4.60  |
| 57 | $\text{Sr}_{0.875}\text{K}_{0.125}\text{Fe}_{0.375}\text{Mn}_{0.625}\text{O}_{3-\delta}$  | 3 h, 1000 °C | Impure      | -     |
| 58 | $\text{Sr}_{0.875}\text{Ca}_{0.125}\text{MnO}_{3-\delta}$                                 | 3 h, 1000 °C | Pure        | 39.76 |
| 59 | $\text{SrMnO}_{3-\delta}$                                                                 | 3 h, 1200 °C | Pure        | 75.36 |
| 60 | $\text{Sr}_{0.75}\text{Ca}_{0.25}\text{Fe}_{0.125}\text{Mn}_{0.875}\text{O}_{3-\delta}$   | 3 h, 1200 °C | Nearly pure | 39.10 |
| 61 | $\text{Sr}_{0.75}\text{Ca}_{0.25}\text{Fe}_{0.25}\text{Mn}_{0.75}\text{O}_{3-\delta}$     | 3 h, 1200 °C | Nearly pure | 20.34 |
| 62 | $\text{Sr}_{0.25}\text{Ba}_{0.75}\text{Fe}_{0.875}\text{Mn}_{0.125}\text{O}_{3-\delta}$   | 3 h, 1000 °C | Impure      |       |
| 63 | $\text{Sr}_{0.375}\text{Ba}_{0.625}\text{Fe}_{0.875}\text{Mn}_{0.125}\text{O}_{3-\delta}$ | 3 h, 1000 °C | Impure      |       |
| 64 | $\text{Sr}_{0.5}\text{Ba}_{0.5}\text{Fe}_{0.875}\text{Mn}_{0.125}\text{O}_{3-\delta}$     | 3 h, 1000 °C | Nearly pure | 5.35  |
| 65 | $\text{Sr}_{0.625}\text{Ba}_{0.375}\text{Fe}_{0.875}\text{Mn}_{0.125}\text{O}_{3-\delta}$ | 3 h, 1000 °C | Nearly pure | 4.23  |
| 66 | $\text{SrFeO}_{3-\delta}$                                                                 | 3 h, 1000 °C | Pure        | 0.17  |
| 67 | $\text{BaFeO}_{3-\delta}$                                                                 | 3 h, 1000 °C | Impure      | -     |
| 68 | $\text{BaMnO}_{3-\delta}$                                                                 | 3 h, 1000 °C | Pure        | 76.58 |
| 69 | $\text{Sr}_{0.75}\text{Ba}_{0.25}\text{Fe}_{0.875}\text{Mn}_{0.125}\text{O}_{3-\delta}$   | 3 h, 1000 °C | Pure        | 9.33  |
| 70 | $\text{Sr}_{0.625}\text{Ba}_{0.375}\text{Fe}_{0.125}\text{Co}_{0.875}\text{O}_{3-\delta}$ | 3 h, 1000 °C | Pure        | 38.48 |
| 71 | $\text{Sr}_{0.5}\text{Ba}_{0.5}\text{Fe}_{0.125}\text{Co}_{0.875}\text{O}_{3-\delta}$     | 3 h, 1000 °C | Pure        | 40.67 |
| 72 | $\text{Sr}_{0.375}\text{Ba}_{0.625}\text{Fe}_{0.125}\text{Co}_{0.875}\text{O}_{3-\delta}$ | 3 h, 1000 °C | Pure        | 30.30 |
| 73 | $\text{Sr}_{0.25}\text{Ba}_{0.75}\text{Fe}_{0.125}\text{Co}_{0.875}\text{O}_{3-\delta}$   | 3 h, 1000 °C | Impure      | -     |
| 74 | $\text{Sr}_{0.875}\text{Ba}_{0.125}\text{FeO}_{3-\delta}$                                 | 3 h, 1000 °C | Pure        | 0.22  |
| 75 | $\text{Sr}_{0.75}\text{Ba}_{0.25}\text{FeO}_{3-\delta}$                                   | 3 h, 1000 °C | Pure        | 0.24  |
| 76 | $\text{Sr}_{0.625}\text{Ba}_{0.375}\text{FeO}_{3-\delta}$                                 | 3 h, 1000 °C | Pure        | 0.22  |
| 77 | $\text{SrFe}_{0.375}\text{Mn}_{0.625}\text{O}_{3-\delta}$                                 | 3 h, 1000 °C | Pure        | 8.64  |
| 78 | $\text{SrFe}_{0.875}\text{Mg}_{0.125}\text{O}_{3-\delta}$                                 | 3 h, 1000 °C | Nearly pure | 1.97  |

|     |                                                                                           |              |             |       |
|-----|-------------------------------------------------------------------------------------------|--------------|-------------|-------|
| 79  | $\text{Sr}_{0.875}\text{Ba}_{0.125}\text{Fe}_{0.875}\text{Mg}_{0.125}\text{O}_{3-\delta}$ | 3 h, 1000 °C | Nearly Pure | 1.12  |
| 80  | $\text{Sr}_{0.75}\text{Ba}_{0.25}\text{Fe}_{0.875}\text{Mg}_{0.125}\text{O}_{3-\delta}$   | 3 h, 1000 °C | Nearly pure | 2.14  |
| 81  | $\text{Sr}_{0.625}\text{Ba}_{0.375}\text{Fe}_{0.875}\text{Mg}_{0.125}\text{O}_{3-\delta}$ | 3 h, 1000 °C | Nearly pure | 6.80  |
| 82  | $\text{SrCoO}_{3-\delta}$                                                                 | 3 h, 1000 °C | Pure        | 39.97 |
| 83  | $\text{SrFe}_{0.125}\text{Co}_{0.875}\text{O}_{3-\delta}$                                 | 3 h, 1000 °C | Pure        | 18.50 |
| 84  | $\text{SrFe}_{0.25}\text{Co}_{0.75}\text{O}_{3-\delta}$                                   | 3 h, 1000 °C | Pure        | 15.09 |
| 85  | $\text{Sr}_{0.875}\text{Ca}_{0.125}\text{CoO}_{3-\delta}$                                 | 3 h, 1000 °C | Pure        | 36.62 |
| 86  | $\text{Sr}_{0.875}\text{Ca}_{0.125}\text{Fe}_{0.875}\text{Co}_{0.125}\text{O}_{3-\delta}$ | 3 h, 1000 °C | Pure        | 2.68  |
| 87  | $\text{Sr}_{0.75}\text{Ca}_{0.25}\text{Fe}_{0.875}\text{Co}_{0.125}\text{O}_{3-\delta}$   | 3 h, 1000 °C | Pure        | 2.03  |
| 88  | $\text{Sr}_{0.875}\text{Ca}_{0.125}\text{Fe}_{0.75}\text{Co}_{0.25}\text{O}_{3-\delta}$   | 3 h, 1000 °C | Pure        | 0.12  |
| 89  | $\text{Sr}_{0.75}\text{Ca}_{0.25}\text{Fe}_{0.75}\text{Co}_{0.25}\text{O}_{3-\delta}$     | 3 h, 1000 °C | Pure        | 0.39  |
| 90  | $\text{Sr}_{0.75}\text{Ca}_{0.25}\text{Fe}_{0.875}\text{Ni}_{0.125}\text{O}_{3-\delta}$   | 3 h, 1000 °C | Impure      | -     |
| 91  | $\text{Sr}_{0.625}\text{Ca}_{0.375}\text{Fe}_{0.875}\text{Ni}_{0.125}\text{O}_{3-\delta}$ | 3 h, 1000 °C | Impure      | -     |
| 92  | $\text{Sr}_{0.5}\text{Ca}_{0.5}\text{Fe}_{0.875}\text{Ni}_{0.125}\text{O}_{3-\delta}$     | 3 h, 1000 °C | Nearly pure | 0.77  |
| 93  | $\text{Sr}_{0.375}\text{Ca}_{0.625}\text{Fe}_{0.875}\text{Ni}_{0.125}\text{O}_{3-\delta}$ | 3 h, 1000 °C | Nearly pure | 0.24  |
| 94  | $\text{Sr}_{0.75}\text{Ca}_{0.25}\text{Fe}_{0.875}\text{Mg}_{0.125}\text{O}_{3-\delta}$   | 3 h, 1000 °C | Nearly pure | 0.91  |
| 95  | $\text{Sr}_{0.625}\text{Ca}_{0.375}\text{Fe}_{0.875}\text{Mg}_{0.125}\text{O}_{3-\delta}$ | 3 h, 1000 °C | Nearly pure | 0.52  |
| 96  | $\text{Sr}_{0.5}\text{Ca}_{0.5}\text{Fe}_{0.875}\text{Mg}_{0.125}\text{O}_{3-\delta}$     | 3 h, 1000 °C | Pure        | 0.48  |
| 97  | $\text{Sr}_{0.375}\text{Ca}_{0.625}\text{Fe}_{0.875}\text{Mg}_{0.125}\text{O}_{3-\delta}$ | 3 h, 1000 °C | Pure        | 0.39  |
| 98  | $\text{Sr}_{0.875}\text{Ba}_{0.125}\text{MnO}_{3-\delta}$                                 | 3 h, 1200 °C | Pure        | 66.18 |
| 99  | $\text{Sr}_{0.75}\text{Ba}_{0.25}\text{MnO}_{3-\delta}$                                   | 3 h, 1200 °C | Pure        | 77.85 |
| 100 | $\text{Sr}_{0.625}\text{Ba}_{0.375}\text{MnO}_{3-\delta}$                                 | 3 h, 1200 °C | Nearly pure | 68.59 |

## 2. Heatmaps of remaining perovskite structures passing each screened step

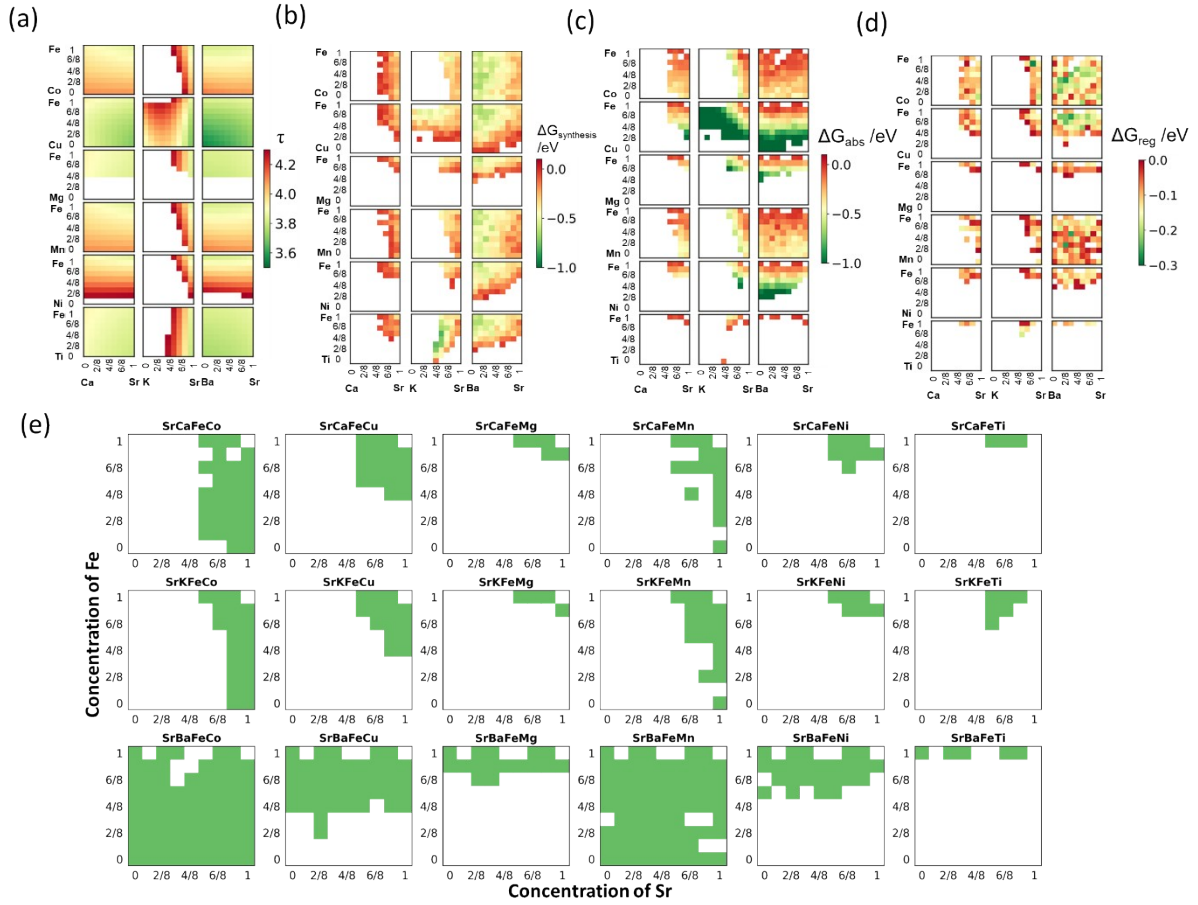

**Figure S1.** Heatmaps of remaining perovskite structures passing each screened step. (a)  $\tau$  after modified tolerance factor screening ( $\tau \leq 4.3$ ); (b)  $\Delta G_{\text{synthesis}}$  after the screening step of (a) and the screening of synthesis process ( $\Delta G_{\text{synthesis}} \leq 0$  eV); (c)  $\Delta G_{\text{abs}}$  after the screening step of (b) and the reduction and carbonation process under  $\text{H}_2$  and  $\text{CO}_2$  condition ( $\Delta G_{\text{abs}} \leq 0$  eV); (d)  $\Delta G_{\text{reg}}$  after the screening step of (c) and the regeneration of the crystal structure under  $\text{O}_2$  condition ( $\Delta G_{\text{reg}} \leq 0$  eV); The color bars are shown respectively to indicate the values. (e) the final screened structure composition. Green areas indicate the materials that pass all the criteria. The x and y axes denote the concentration of Sr and Fe of  $\text{Sr}_x\text{A}_{1-x}\text{Fe}_y\text{B}_{1-y}\text{O}_{3-\delta}$  composition, respectively. For example, when  $x=2/8$  and  $y=3/8$  for SrBaFeCu composition, it means the  $\text{Sr}_{0.25}\text{Ba}_{0.75}\text{Fe}_{0.375}\text{Cu}_{0.625}\text{O}_{3-\delta}$  structure

3. **Figure S2.** XRD patterns of the samples screened

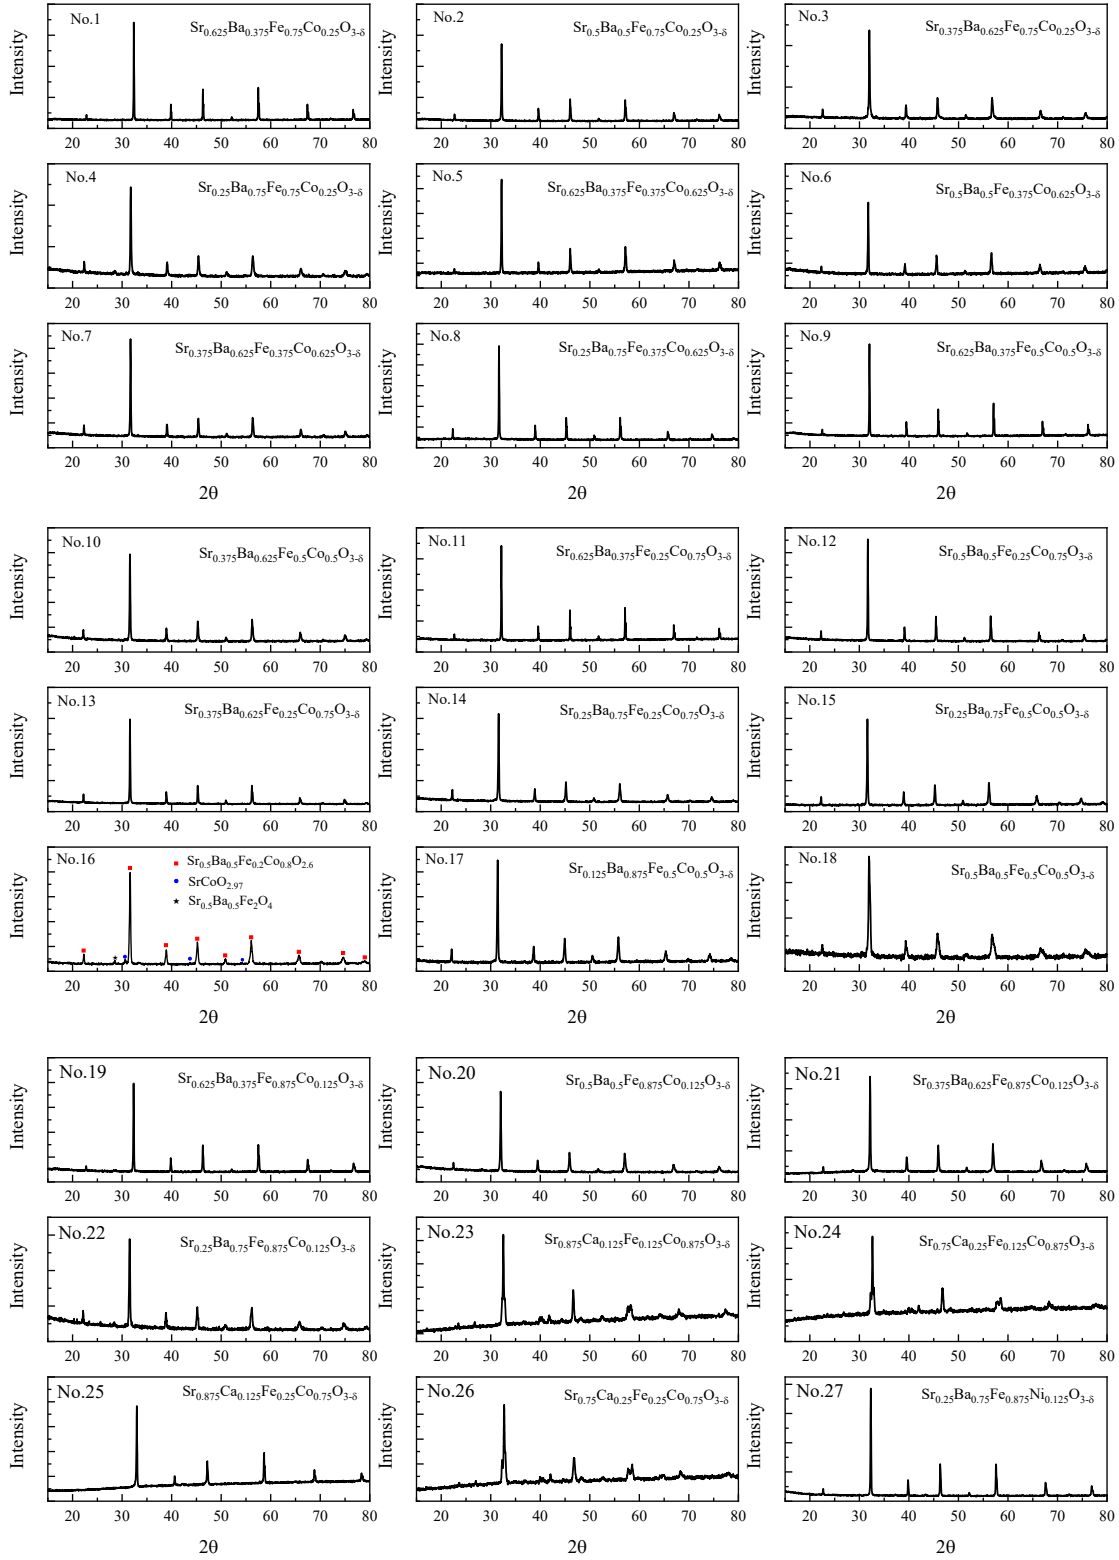

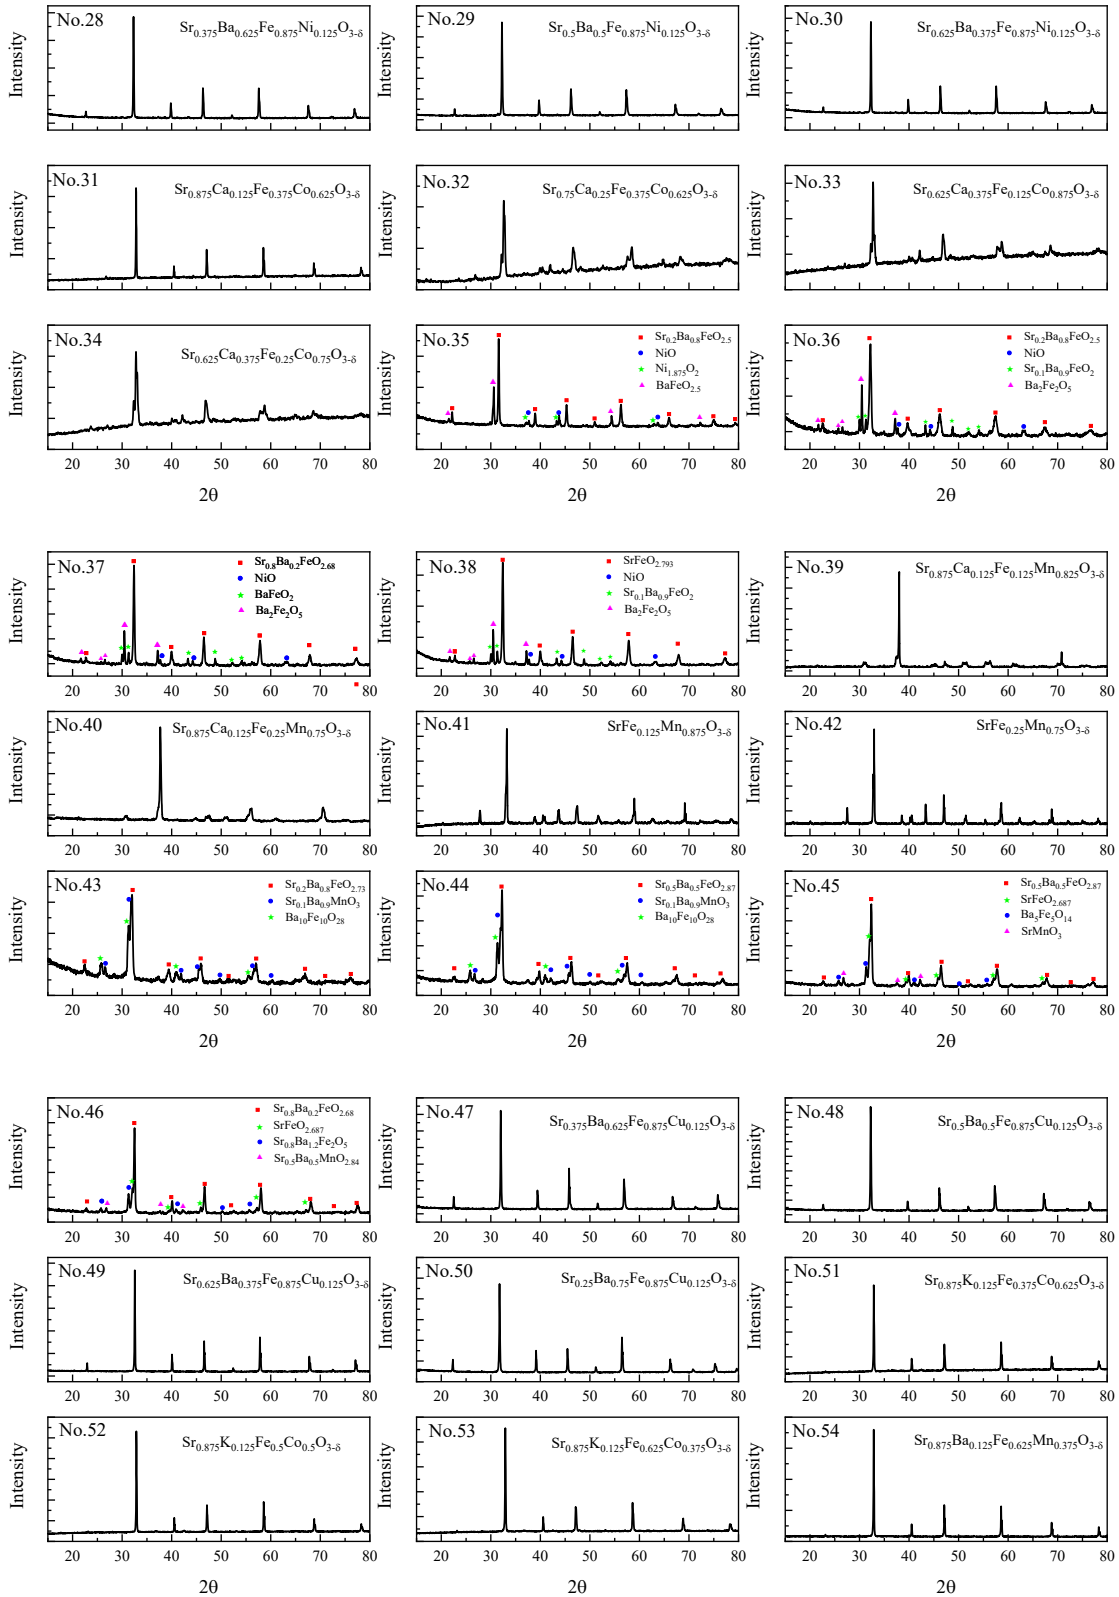

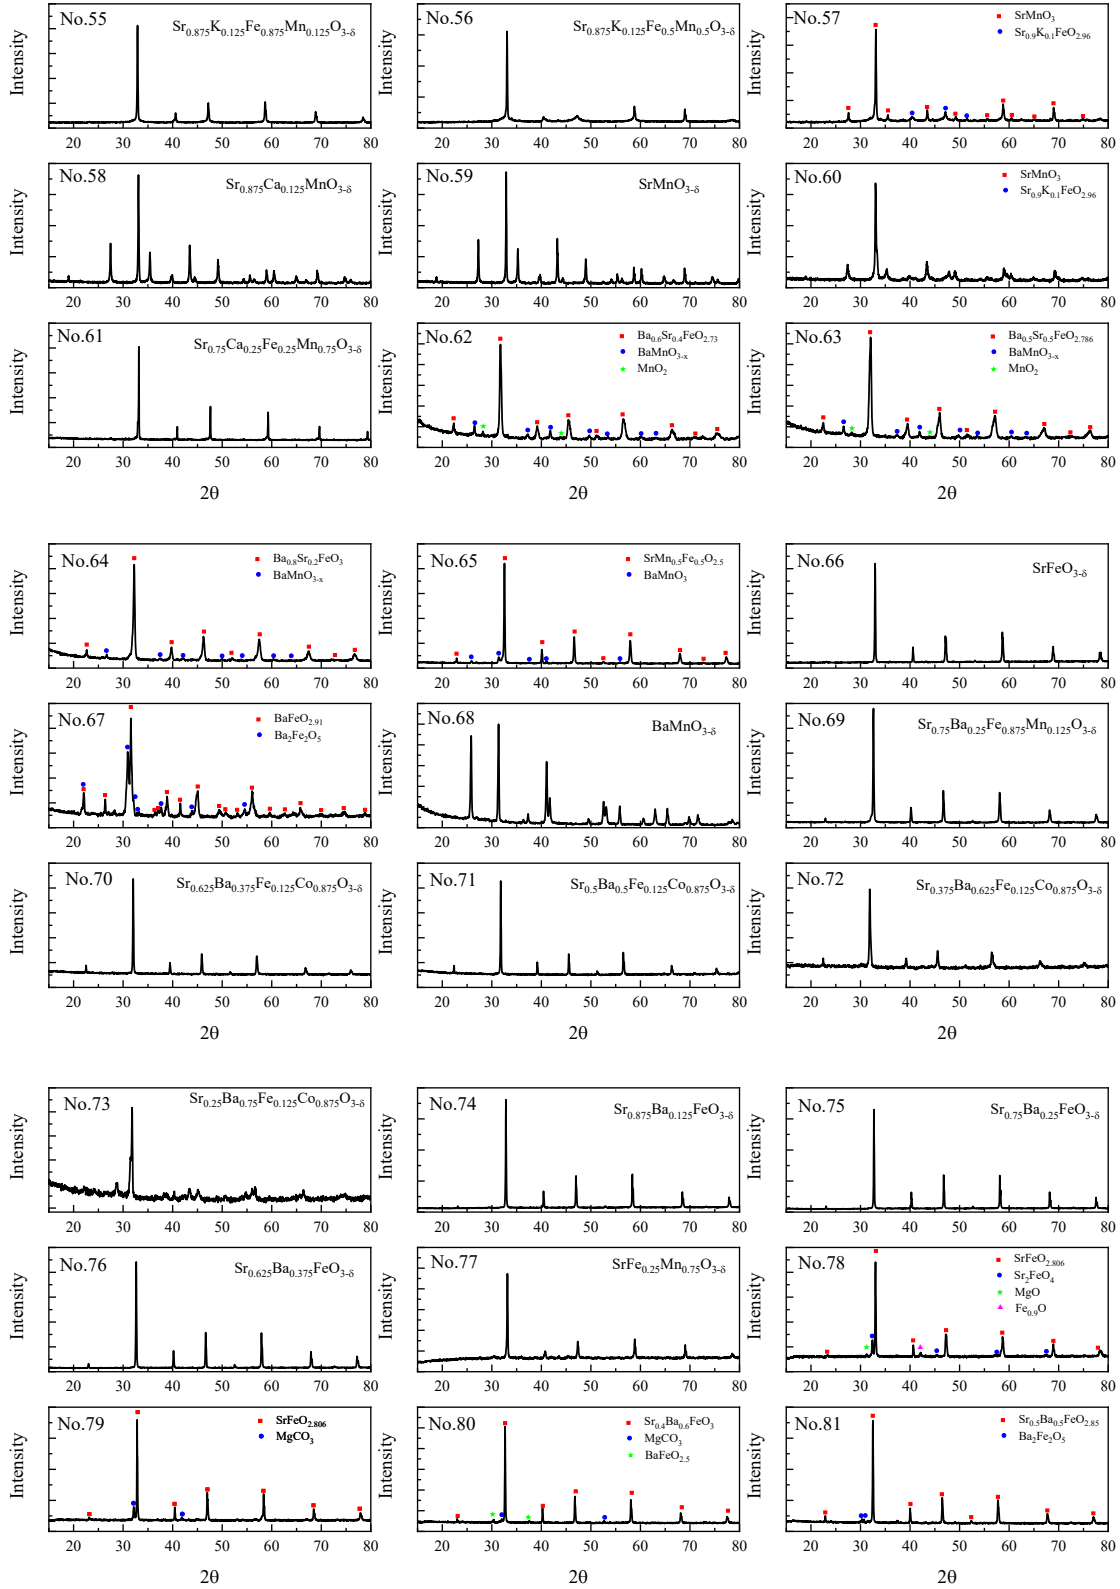



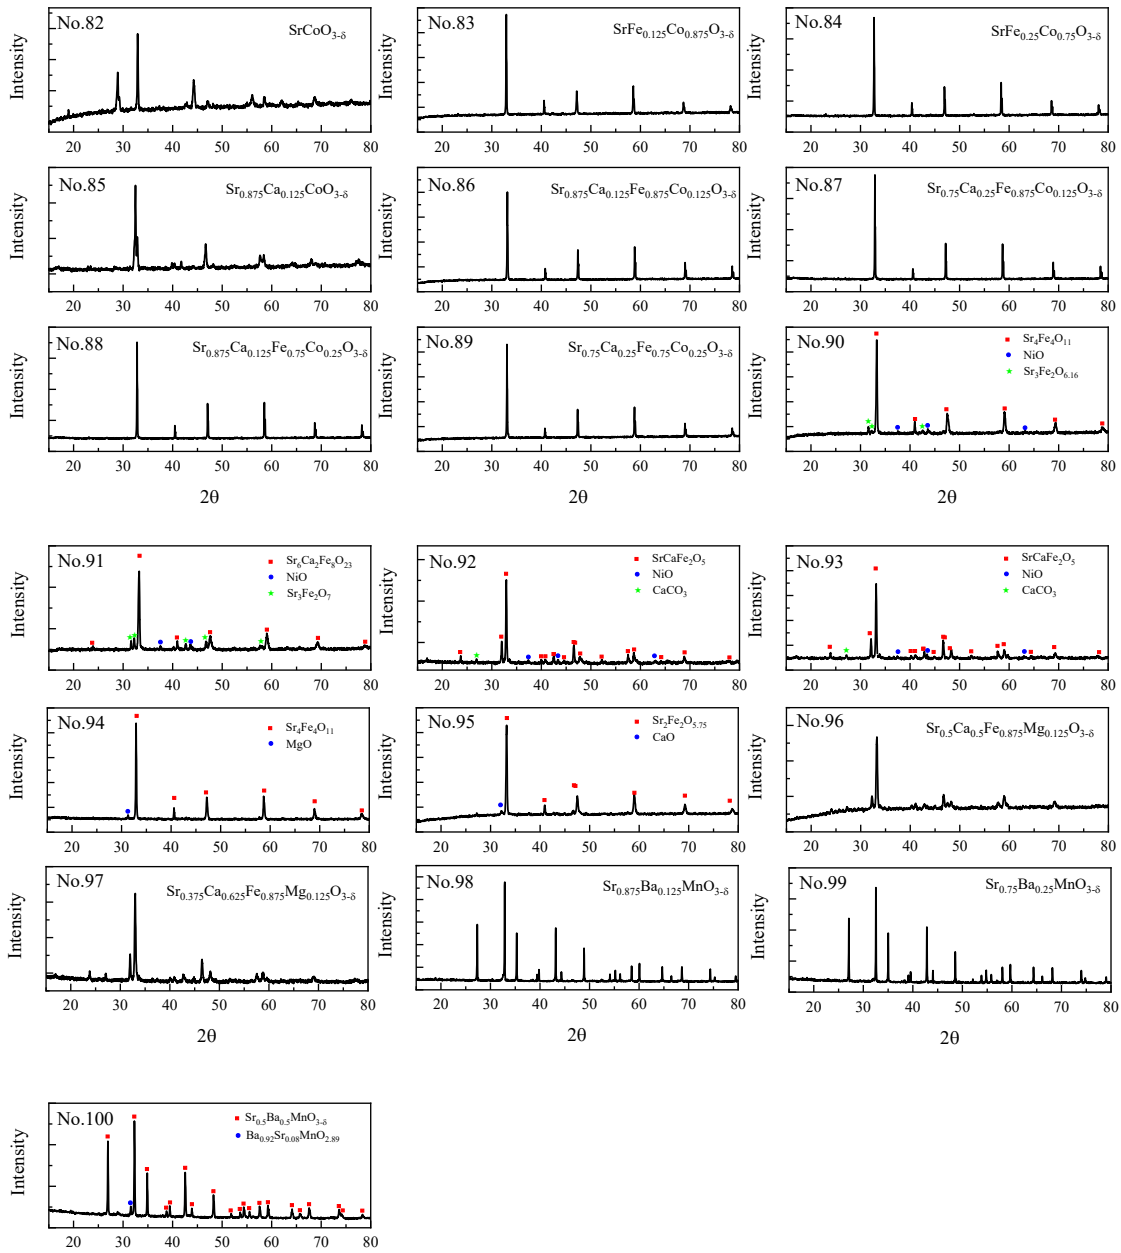

Figure S2. XRD patterns of the samples screened

#### 4. Additional comparison results between DFT simulation and experimental measurement

Considering the significant influence of A-site and B-site dopants on the sorption capacities of  $\text{Sr}_x\text{Ba}_{1-x}\text{Fe}_y\text{Co}_{1-y}\text{O}_{3-\delta}$  and  $\text{Sr}_x\text{Ba}_{1-x}\text{Fe}_y\text{Mn}_{1-y}\text{O}_{3-\delta}$  perovskites, we conducted a more detailed fitting analysis based on the A-site and B-site doping fractions. As shown in Figure S3(a), a linear fitting correlation (Eq. (1-1)) resulted in a statistical  $R^2$  value of 0.7290. However, it was observed from experiments that excessive cobalt doping led to a reduction in sorption capacity. Consequently, we employed a non-linear fitting correlation (Eq. (1-2)), which yielded a higher  $R^2$  value of 0.8510. It is clearly indicated that, for the  $\text{Sr}_x\text{Ba}_{1-x}\text{Fe}_y\text{Co}_{1-y}\text{O}_{3-\delta}$  perovskites, the impact of B-site doping outweighed that of A-site doping. For the  $\text{Sr}_x\text{Ba}_{1-x}\text{Fe}_y\text{Mn}_{1-y}\text{O}_{3-\delta}$  perovskites, the linear fitting also achieved a substantial  $R^2$  value of 0.8872.

$$\text{SC} = 7.0992 - 0.4123(1-x) + 46.9698(1-y) \quad (1-1)$$

$$\text{SC} = 5.6242 - 18.4125(1-x) + 133.2972(1-y) - 97.1017(1-y)^2 \quad (1-2)$$

$$\text{SC} = -7.9051 + 18.8008(1-x) + 68.7125(1-y) \quad (1-3)$$

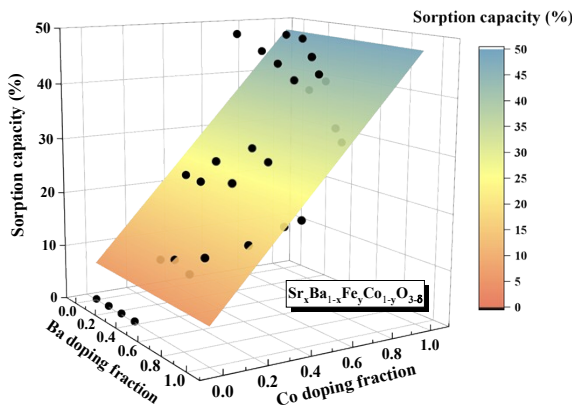

(a)

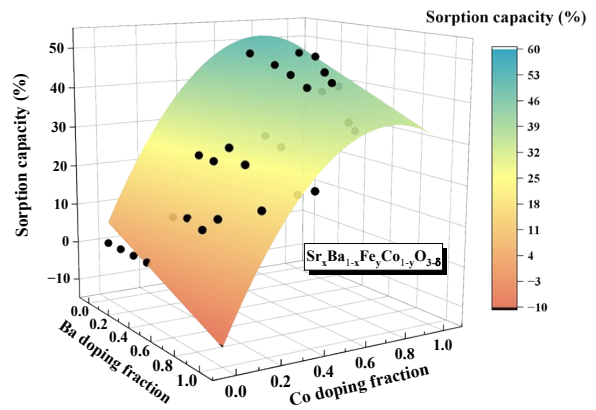

(b)

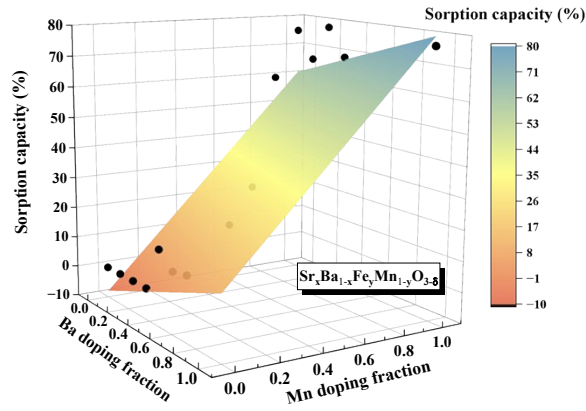

(c)

**Figure S3.** Fitting results between the doping fractions of A-site and B-site elements and the sorption capacity. (a) linear fitting of  $\text{Sr}_x\text{Ba}_{1-x}\text{Fe}_y\text{Co}_{1-y}\text{O}_{3-\delta}$ ; (b) non-linear fitting of  $\text{Sr}_x\text{Ba}_{1-x}\text{Fe}_y\text{Co}_{1-y}\text{O}_{3-\delta}$ ; (c) linear fitting of  $\text{Sr}_x\text{Ba}_{1-x}\text{Fe}_y\text{Mn}_{1-y}\text{O}_{3-\delta}$

Additionally, to identify an effective correlation for predicting  $\text{CO}_2$  capacity, we first conducted a preliminary examination on the independence of three fitting variables,  $\Delta G_{\text{syn}}$ ,  $\Delta G_{\text{abs}}$ , and  $\Delta G_{\text{reg}}$ . The correlations between  $\Delta G_{\text{syn}}$  and  $\Delta G_{\text{abs}}$ ,  $\Delta G_{\text{syn}}$  and  $\Delta G_{\text{reg}}$ , and  $\Delta G_{\text{abs}}$  and  $\Delta G_{\text{reg}}$  are 0.7676, -0.5870, and -0.8022, respectively. Thus, we can consider them as three independent variables for fitting purposes. The fitting correlations and their corresponding statistical  $R^2$  values are provided in Table S3 for reference.

**Table S2.** Fitting results between the sorption capacity and different descriptors

| Fitting equation                                                                                                              | $R^2$  | Equation number |
|-------------------------------------------------------------------------------------------------------------------------------|--------|-----------------|
| $\text{SC} = -172.5190 * (\Delta G_{\text{abs}} + \Delta G_{\text{reg}}) - 24.2130$                                           | 0.7649 | (2-1)           |
| $\text{SC} = 50.3100 + 45.1591 * \Delta G_{\text{syn}}$                                                                       | 0.0711 | (2-2)           |
| $\text{SC} = 51.4505 + 144.5702 * \Delta G_{\text{abs}}$                                                                      | 0.1817 | (2-3)           |
| $\text{SC} = 10.8055 - 112.2743 * \Delta G_{\text{reg}}$                                                                      | 0.6389 | (2-4)           |
| $\text{SC} = 46.3083 - 24.9376 * \Delta G_{\text{abs}} + 182.9161 * \Delta G_{\text{reg}}$                                    | 0.1906 | (2-5)           |
| $\text{SC} = -15.8277 - 52.3066 * \Delta G_{\text{syn}} - 137.7448 * \Delta G_{\text{reg}}$                                   | 0.7014 | (2-6)           |
| $\text{SC} = -30.0746 - 204.5265 * \Delta G_{\text{abs}} - 180.2220 * \Delta G_{\text{reg}}$                                  | 0.7685 | (2-7)           |
| $\text{SC} = -31.7904 - 9.7560 * \Delta G_{\text{syn}} - 188.2580 * \Delta G_{\text{abs}} - 179.5680 * \Delta G_{\text{reg}}$ | 0.7698 | (2-8)           |

## 5. Detailed demonstration results of methane, biogas and biomass

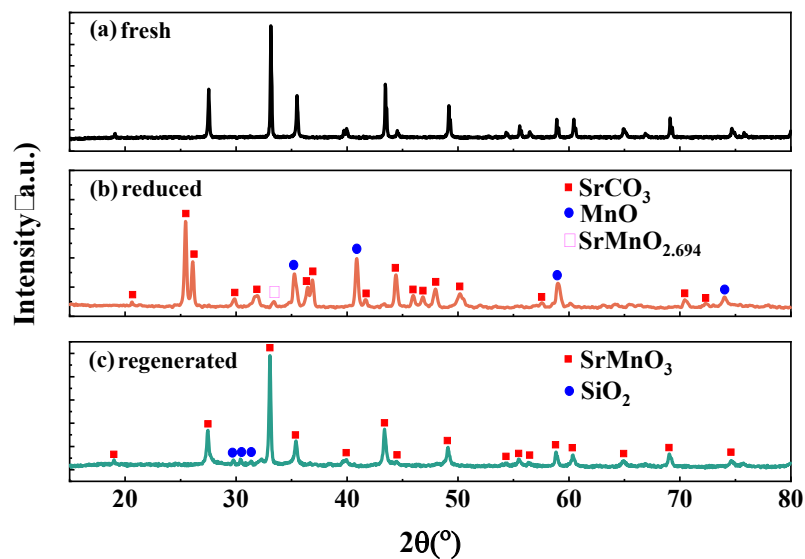

**Figure S4.** XRD patterns of samples from the sorption-enhanced biogas reforming experiments. (a) fresh sample; (b) reduced sample; (c) regenerated sample after 20 cycles. The presence of  $\text{SiO}_2$  in the sample could originate from the inert packing material of quartz wool or the reactor wall of the quartz U-tube

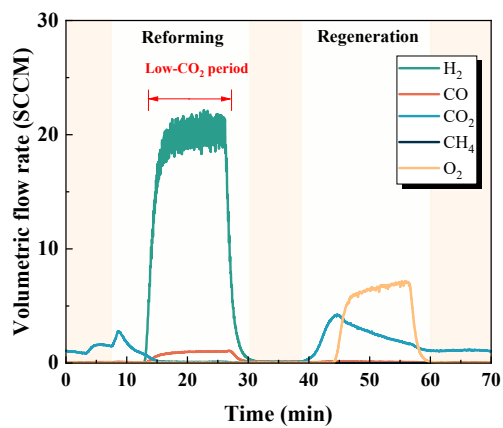

(a)

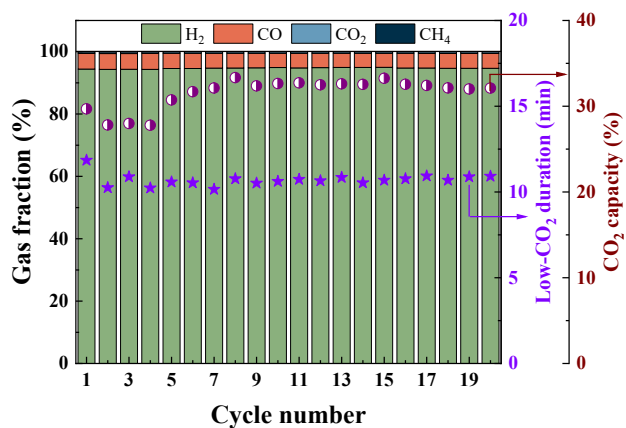

(b)

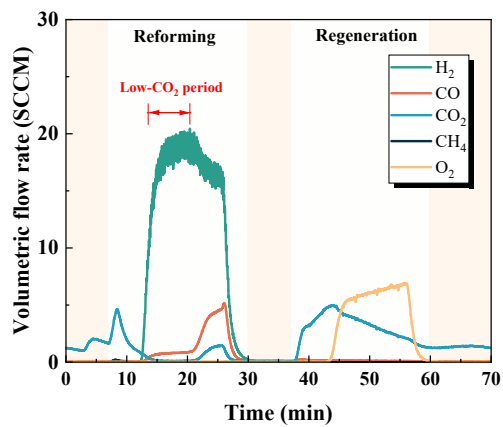

(c)

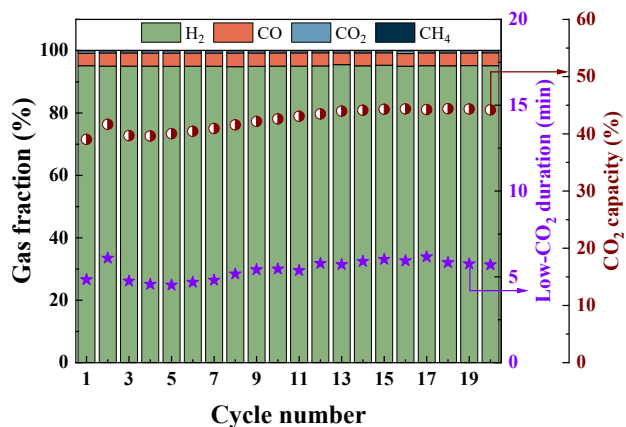

(d)

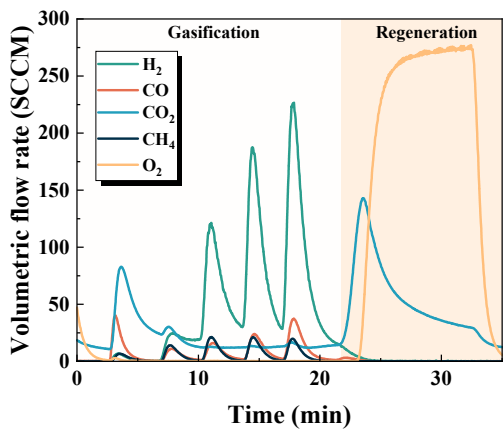

(e)

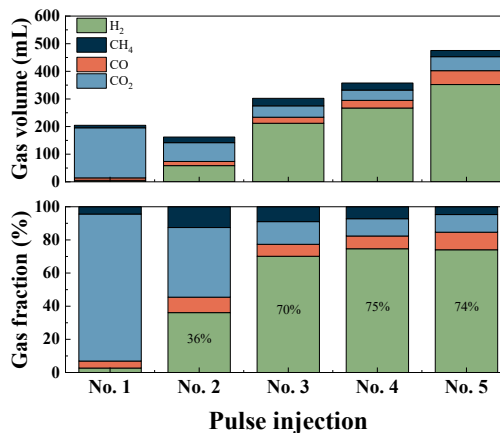

(f)

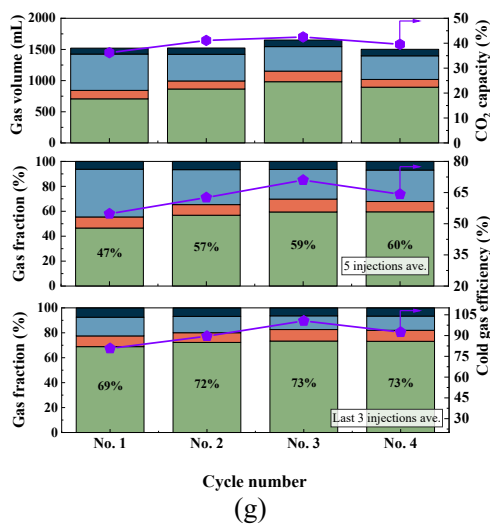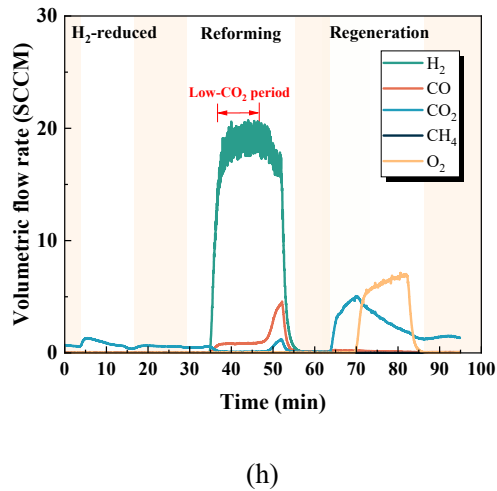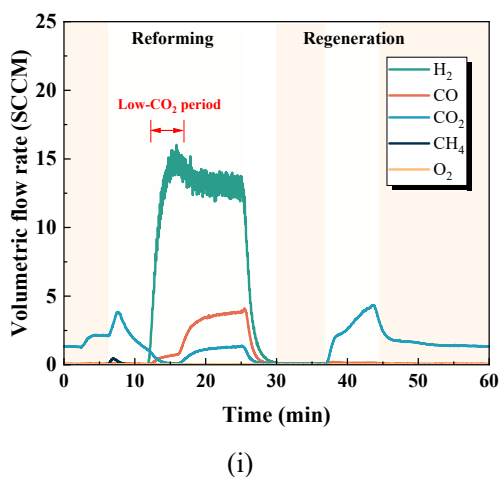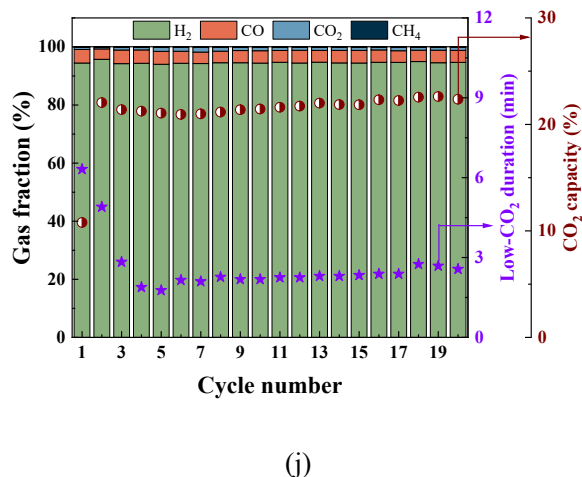

**Figure S5** Reactor performance results. Sorption-enhanced steam reforming of methane (a, b), biogas(c, d), sorption-enhanced gasification of biomass (e, f, g), and sorption-enhanced steam reforming of biogas with H<sub>2</sub> pre-reduction (h) and partial regeneration (i, j). (a, c, e, h, and i): typical product profiles measured by online MS. (b, d, and j): Low-CO<sub>2</sub> duration, sorption capacity, and dry-basis and Ar-free concentrations of gaseous products during the low-CO<sub>2</sub> period over 20 cycles. (f): dry-basis and Ar-free concentrations of gaseous products and their gas volumes in five different pulse injections; (g): sorption capacity, total gas volume, average gaseous concentrations, and cold gas efficiencies of five injections and average gaseous concentrations of last three injections over four cycles.

## 6. Life-cycle assessment

The goal of this simplified life-cycle assessment is to evaluate the global house gas (GHG) emissions associated with hydrogen production through the sorption-enhanced reforming of biogas (SERB). As illustrated in Figure S4, the functional units considered in this study included a biogas production plant, a sulfur removal unit, a SERB plant, a hydrogen purification system, a carbon sequestration system, and a cryogenic air separation plant. In this process, after the removal of H<sub>2</sub>S, the biogas is directed to the SERB plant to produce hydrogen with a purity up to 95%. Subsequently, a hydrogen purification system is employed to further increase the hydrogen concentration for downstream applications. Additionally, 99% pure oxygen generated by the cryogenic air separation plant is used to initiate the release of pure CO<sub>2</sub>. The captured CO<sub>2</sub> is then compressed to 150 bar and transported via a pipeline to a nearby underground storage site for carbon sequestration.

Given its developmental stage, it is difficult to accurately estimate the CO<sub>2</sub> emissions during the construction phase. However, previous studies have indicated that CO<sub>2</sub> emissions related to equipment manufacturing and construction constitute only a minor percentage of the total emissions in a chemical looping power plant [1,2]. Additionally, previous studies also indicated that oxygen carriers and catalysts contribute only a small percentage to the global warming potential (GWP) during the adequate operational lifetime [1,3]. Consequently, the GWP associated with plant construction and catalyst manufacturing was not included in our current LCA study. The CO<sub>2</sub> leakage during piping and sequestration is also assumed to be negligible compared to the large quantity of CO<sub>2</sub> stored.

The amount of O<sub>2</sub> necessary for sorbent regeneration and decarbonation plays a crucial role in defining the energy requirements for O<sub>2</sub> production. Consequently, the oxygen consumption rate is specified by Eq. (3). The composition of the raw biogas is assumed to be 60% CH<sub>4</sub>, 35% CO<sub>2</sub>, 4.7% H<sub>2</sub>O, and 0.3% H<sub>2</sub>S. The global warming potential (GWP) of each functional unit is summarized in Table. S3. The hydrogen yield and CO<sub>2</sub> capture efficiency were determined based on the performance results during the low-CO<sub>2</sub> period (as shown in Figure S4(i/j)). They can be obtained by Eqs. (4-5):

$$O_2 \text{ consumption rate} = \frac{n_{O_2, \text{feed}}}{n_{CO_2, \text{release}}} \quad (3)$$

$$H_2 \text{ yield} = \frac{n_{H_2, \text{produced}}}{n_{CH_4, \text{feed}}} \quad (4)$$

$$\eta_{CO_2 \text{ capture}} = \frac{n_{CH_4, \text{feed}} + n_{CO_2, \text{feed}} - n_{COx, \text{observed}}}{n_{CH_4, \text{feed}}} \quad (5)$$

The total GHG emissions are estimated to be approximately -2.18 kg CO<sub>2</sub>eq per kg of H<sub>2</sub> produced, signifying a net reduction in GHG emissions. We also explored a scenario involving the recycling of exhaust gas from the purification unit back to the reforming reactor. Assuming a typical hydrogen recovery efficiency of 0.9, the actual hydrogen yield decreased to 3.15 mol H<sub>2</sub>/mol CH<sub>4</sub>. Consequently, the corresponding GHG emissions would decrease to -2.42 kg CO<sub>2</sub>eq/kg H<sub>2</sub>, as more CO<sub>2</sub> would be captured in the production of 1 kg of hydrogen. However, we have chosen to report the more conservative value in our paper.

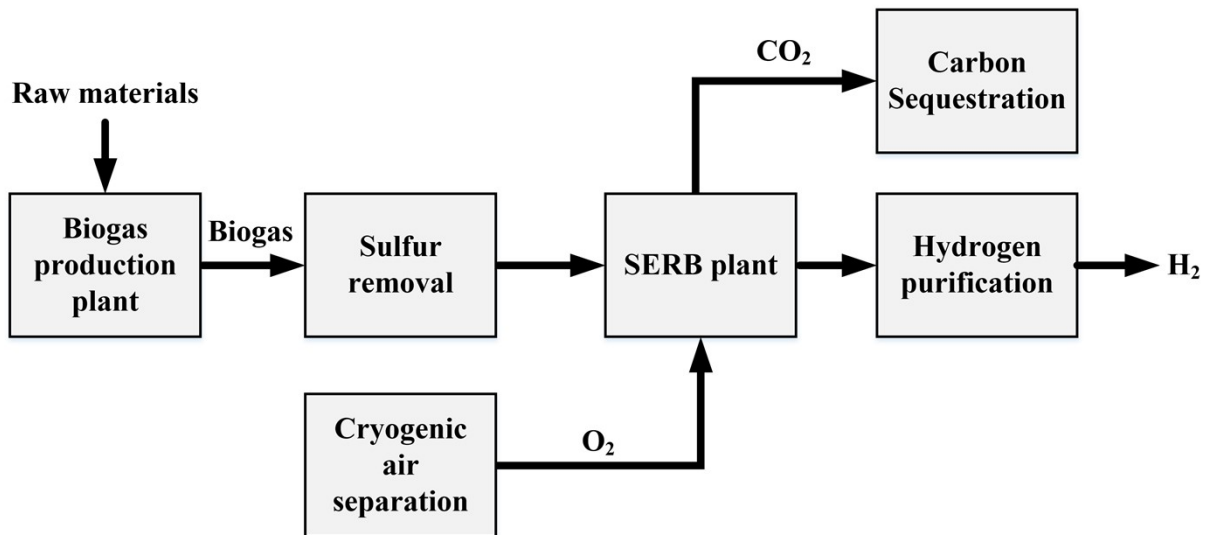

**Figure S6.** System boundary of hydrogen production through the sorption-enhanced reforming of biogas (SERB) process



**Table S3.** GWP of each functional unit and the relevant key parameters for the LCA calculation

| Subsystem               | Items                              | Unit                                      | Value    | Reference   |
|-------------------------|------------------------------------|-------------------------------------------|----------|-------------|
| Biogas production plant | GWP                                | kg CO <sub>2</sub> eq/mol CH <sub>4</sub> | 0.02788  | [4]         |
| Sulfur removal          | GWP                                | kg CO <sub>2</sub> eq/kg H <sub>2</sub> S | 13.9     | [5]         |
|                         | GWP                                | kg CO <sub>2</sub> eq/mol CH <sub>4</sub> | 0.002363 |             |
| Oxygen separation       | Electricity consumption            | kWhe/ton O <sub>2</sub>                   | 300      | [6]         |
|                         | GWP                                | g CO <sub>2</sub> eq/kWhe                 | 600      | [7]         |
|                         | GWP                                | kg CO <sub>2</sub> eq/mol O <sub>2</sub>  | 0.01025  | Calculation |
| Hydrogen purification   | GWP                                | kg CO <sub>2</sub> eq/mol CH <sub>4</sub> | 0.000311 | [4]         |
| SERB plant              | Hydrogen yield                     | mol H <sub>2</sub> /mol CH <sub>4</sub>   | 3.5      | Experiment  |
|                         | Oxygen consumption rate            | mol O <sub>2</sub> /mol CO <sub>2</sub>   | 1.29     |             |
|                         | CO <sub>2</sub> capture efficiency | mol CO <sub>2</sub> /mol CH <sub>4</sub>  | 1.38     | Calculation |
|                         | GWP                                | kg CO <sub>2</sub> eq/mol CH <sub>4</sub> | -0.06072 |             |
| Carbon sequestration    | CO <sub>2</sub> compression        | kWhe/kgCO <sub>2</sub>                    | 0.116    | [8]         |
|                         | CO <sub>2</sub> transport          | kWhe/kgCO <sub>2</sub>                    | 0.005    | [9]         |
|                         | CO <sub>2</sub> injection          | kWhe/kgCO <sub>2</sub>                    | 0.007    | [9]         |
|                         | GWP                                | kg CO <sub>2</sub> eq/mol CH <sub>4</sub> | 0.0046   | Calculation |
| Total                   | GWP                                | kg CO <sub>2</sub> eq/mol CH <sub>4</sub> | -0.0199  | Calculation |
|                         | GWP                                | kg CO <sub>2</sub> eq/kg H <sub>2</sub>   | -2.18    |             |

## 7. Detailed methodology

### 7.1 The approach to calculate the sorption capacity in the TGA

We assumed the oxygen uptake rate far surpassed the decarbonation rate. As a result, the initial weight gain observed during the regeneration step could be attributed solely to oxygen uptake. The separated B-site metal oxides were assumed to be oxidized to  $Mn_2O_3$ ,  $Co_3O_4$ ,  $NiO$ ,  $CuO$ , and  $Fe_2O_3$ . Furthermore, based on this assumption, the perovskite material would promptly reform following the decarbonation process in the regeneration step. The corresponding observed weight loss was the net weight change between the  $CO_2$  release and oxygen uptake. The  $CO_2$  sorption capacity can be calculated by Eq. (6).

$$SC = \left( \frac{m_1}{MW_{CO_2}} + \frac{m_2}{MW_{CO_2} - \delta_1 MW_O} \right) \div \left( \alpha \cdot \frac{m_{reduced}}{MW_{reduced}} \right) \quad (6)$$

As illustrated in Figure S7,  $m_1$  and  $m_2$  are the weight losses at the second purge step and the regeneration step, respectively.  $MW_{CO_2}$  is the molar mass of  $CO_2$  molecule, and  $MW_{reduced}$  is the reduced perovskite mixture.  $\delta_1$  represents the number of oxygen atoms absorbed by the B-site metal during the weight loss period in the regeneration step. For example,  $Co_3O_4$  absorbs 0.63 oxygen atom when fully regenerated into the valence state of B-site in  $SrCoO_{2.8}$ .  $\alpha$  is the weighted ratio representing the theoretical maximum  $CO_2$  capacity of A-site elements. Ca, Sr, and Ba can absorb  $CO_2$  with a ratio of 1:1, while K can only absorb  $CO_2$  with a ratio of 0.5:1. The method for calculating  $CO_2$  capacity reported in our previous study [10] represents a specific instance of Eq.(6), which  $\delta_1$  is approximately 0 (Brownmillerite phase) while  $\alpha$  is 1.

The oxygen capacity can be calculated by Eq. (7).

$$OC = \left( \frac{m_3}{MW_O} + \frac{m_2 \cdot \delta_1 MW_O}{MW_{CO_2} - \delta_1 MW_O} \right) \div \left( \frac{m_{reduced}}{MW_{reduced}} \right) \quad (7)$$

Where  $m_3$  is the weight gain at the beginning of regeneration step,  $MW_O$  is the molar mass of O atom.

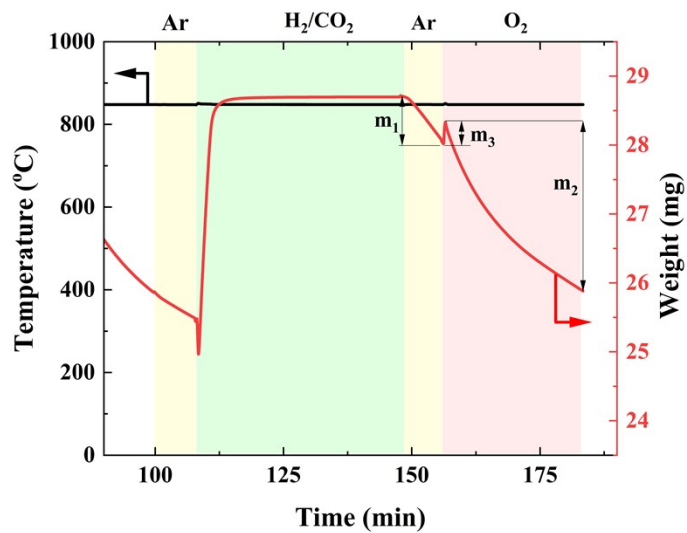

**Figure S7.** A typical TGA experiment for measuring the sorption capacity and oxygen capacity of the perovskite oxide

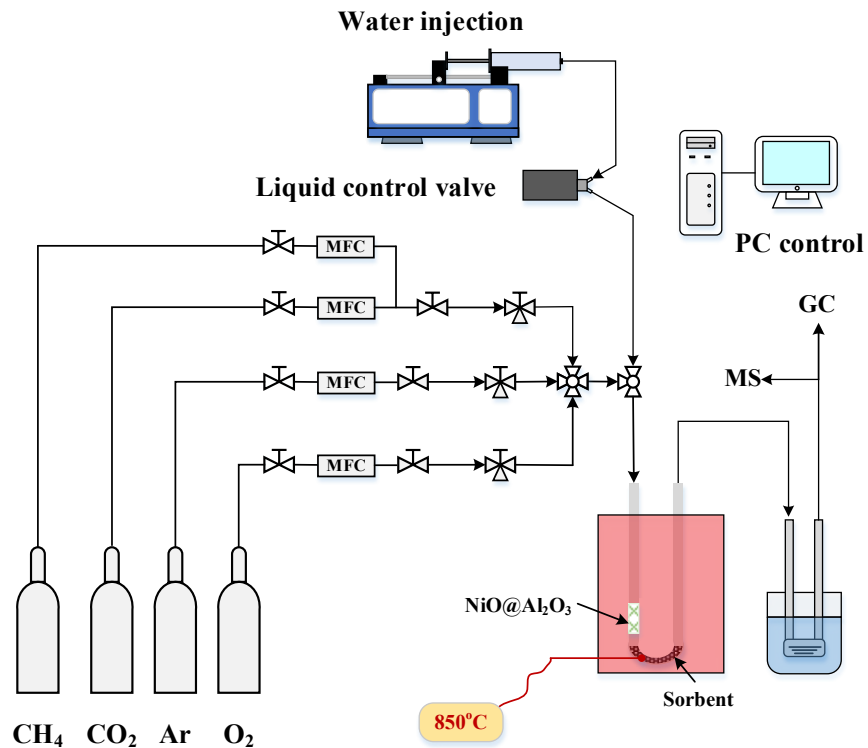

**Figure S8.** Schematics of the packed bed reactor system for the sorption-enhanced steam reforming of methane and biogas

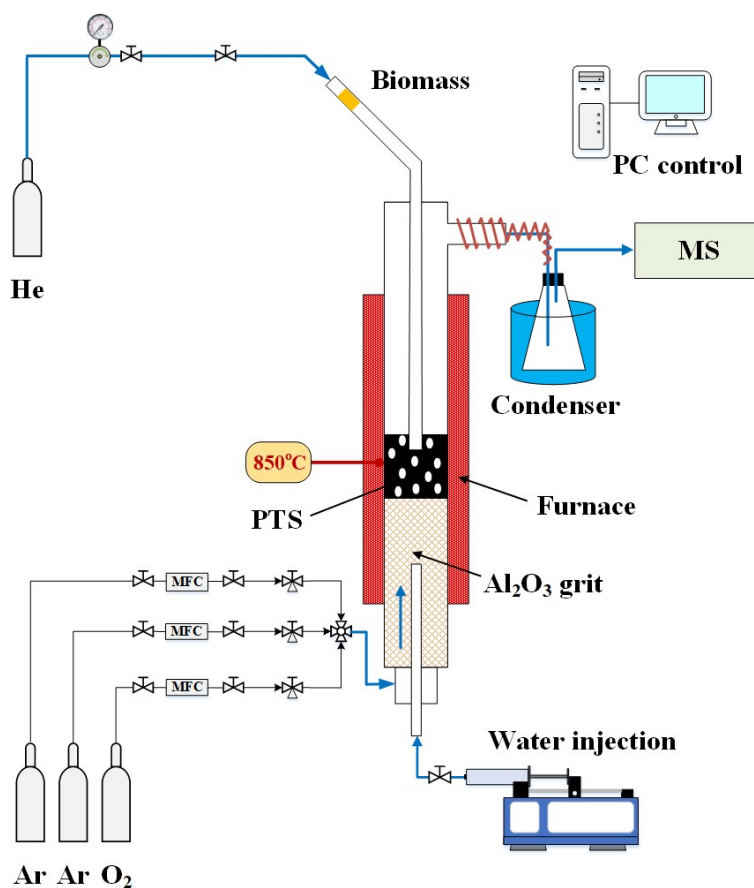

**Figure S9.** Schematics of the bubbling fluidized bed reactor

**Table S4.** The proximate and ultimate analyses of as-received biomass used for the tests of sorption-enhanced gasification of biomass

| Parameter | $M_{\text{ar}}^*$ | $A_{\text{ar}}$ | $V_{\text{ar}}$ | $C_{\text{daf}}^{**}$ | $H_{\text{daf}}$ | $N_{\text{daf}}$ | $O_{\text{daf}}$ | $\text{LHV}_{\text{ar}}$ |
|-----------|-------------------|-----------------|-----------------|-----------------------|------------------|------------------|------------------|--------------------------|
| Unit      | %                 | %               | %               | %                     | %                | %                | %                | MJ/kg                    |
| Value     | 5.34              | 2.3             | 77.6            | 50                    | 6.2              | 0.1              | 43.7             | 15.55                    |

\*: as received samples

\*\* : dried ash-free samples

## References:

- [1] Fan, J., Hong, H. & Jin, H. Life cycle global warming impact of CO<sub>2</sub> capture by in-situ gasification chemical looping combustion using ilmenite oxygen carriers. *J. Clean. Prod.* **234**, 568-578, (2019).
- [2] Fan, J., Hong, H. & Jin, H. Power Generation Based on Chemical Looping Combustion: Will it qualify to reduce greenhouse gas emissions from life-cycle assessment? *ACS Sustain. Chem. Eng.* **6**, 6730-6737, (2018).
- [3] Navajas, A. et al. Life cycle assessment of natural gas fuelled power plants based on chemical looping combustion technology. *Energy Convers. Manage.* **198**, 111856, (2019).
- [4] Hajjaji, N., Martinez, S., Trably, E., Steyer, J.-P. & Helias, A. Life cycle assessment of hydrogen production from biogas reforming. *Int. J. Hydrogen Energy* **41**, 6064-6075, (2016).
- [5] Cano, P. I. et al. Life cycle assessment of different physical-chemical and biological technologies for biogas desulfurization in sewage treatment plants. *J. Clean. Prod.* **181**, 663-674, (2018).
- [6] Dong, X., Wang, B., Yip, H. L. & Chan, Q. N. CO<sub>2</sub> emission of electric and gasoline vehicles under various road conditions for China, Japan, Europe and world average—prediction through Year 2040. *Appl. Sci.* **9**, 2295, (2019).
- [7] Mehrpooya, M., Golestani, B. & Ali Mousavian, S. M. Novel cryogenic argon recovery from the air separation unit integrated with LNG regasification and CO<sub>2</sub> transcritical power cycle. *Sustain. Energy Technol. Assess.* **40**, 100767, (2020).
- [8] Rochelle, G. et al. Aqueous piperazine as the new standard for CO<sub>2</sub> capture technology. *Chem. Eng. J.* **171**, 725-733, (2011).
- [9] Chisalita, D.-A. et al. Assessing the environmental impact of an integrated steel mill with post-combustion CO<sub>2</sub> capture and storage using the LCA methodology. *J. Clean. Prod.* **211**, 1015-1025, (2019).
- [10] Brody, L. et al. Perovskite-based phase transition sorbents for sorption-enhanced oxidative steam reforming of glycerol. *ACS Sustain. Chem. Eng.* **10**, 6434-6445, (2022).
